# Supplementary material
Source: PubMed Central journal article supplement (PMC9648614)
Supplement: NIHMS1845516-supplement-2.pdf [file NIHMS1845516-supplement-2.pdf]

# 1 SUPPLEMENTAL INFORMATION

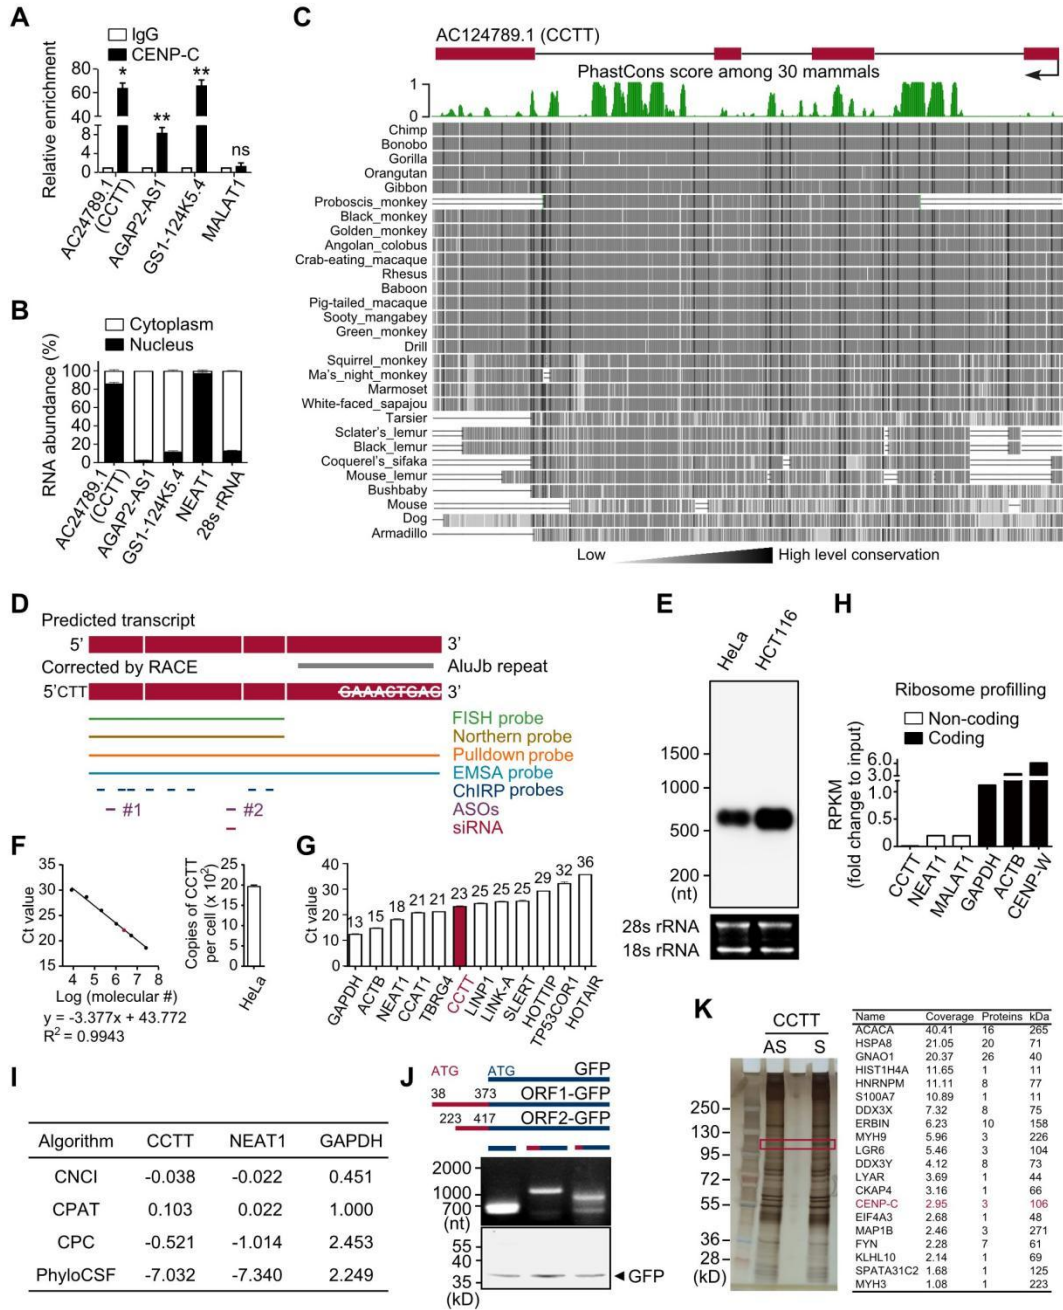

2 **Figure S1. Screening LncRNAs Interacting with CENP-C, Related to**  
 3 **Figure 1**  
 4 (A) CENP-C RIP followed by qPCR analysis of AC24789.1 (CCTT),  
 5 AGAP2-AS1, and GS1-124K5.4 in HeLa cells. MALAT1 was used as a

6 negative control. \*p < 0.05; \*\*p < 0.01; ns, no significant difference (mean ±  
7 SD, n = 3 per group).

8 (B) Percentage of CCTT, AGAP2-AS1, and GS1-124K5.4 expression in  
9 cytoplasmic and nuclear fractions of HeLa cells by qRT-PCR analysis. The  
10 nucleus-enriched NEAT1 and cytoplasm-enriched 28s rRNA were used as  
11 controls (mean ± SD, n = 3 per group).

12 (C) Conservation analysis of CCTT in 30 mammals.

13 (D) Diagram of the predicted CCTT transcript from UCSC Genome Browser  
14 tracks and accurate CCTT sequences corrected by 5' and 3' RACE which has  
15 3 extra nucleotides (CTT) at the 5' end and misses 9 nucleotides  
16 (GAAACTGAG) at the 3' end compared to the annotated version, as well as  
17 the probes, ASOs, and siRNAs used in this study.

18 (E) Northern blot analysis of CCTT in HeLa and HCT116 cells using a probe  
19 against the Alu-deleted CCTT. Agarose gel showed comparable amount of  
20 total RNA.

21 (F) The copy number of CCTT per cell in HeLa cells. Left, the linear  
22 relationship between the log CCTT copy number and its CT value by  
23 qRT-PCR. Black dots represent known copies of CCTT from a plasmid DNA  
24 containing CCTT sequences and the red dot represents CCTT copies in HeLa  
25 cells. Right, the average copies of CCTT per cell (mean ± SD, n = 3 per  
26 group).

27 (G) The relative abundance of CCTT (red) in HeLa cells. The Ct value of each  
28 RNA was shown.

29 (H) Ratio of RPKM ribosome profiling relative to input RPKM in HeLa cells.

30 (I) Scores of CCTT, GAPDH (mRNA), and NEAT1 (lncRNA) determined by

31 CNCI, CPAT, CPC, and PhyloCSF algorithms.

32 (J) *In vitro* translation assay of the predicted CCTT ORFs (ORF1: 38-373 nt  
33 and ORF2: 222-417 nt). HeLa cells expressing the GFP-tagged CCTT ORFs,  
34 followed by western blot analysis of GFP. RT-PCR showed corresponding  
35 RNA.

36 (K) RNA pulldown with biotinylated sense or antisense CCTT from A549 cell  
37 lysates followed by mass spectrometry (MS) analysis. NuPAGE Bis-Tris gel  
38 picture (left) and MS analysis result (right) showed 20 CCTT-interacting  
39 candidate proteins including CENP-C. The band highlighted in red box  
40 contains CENP-C.

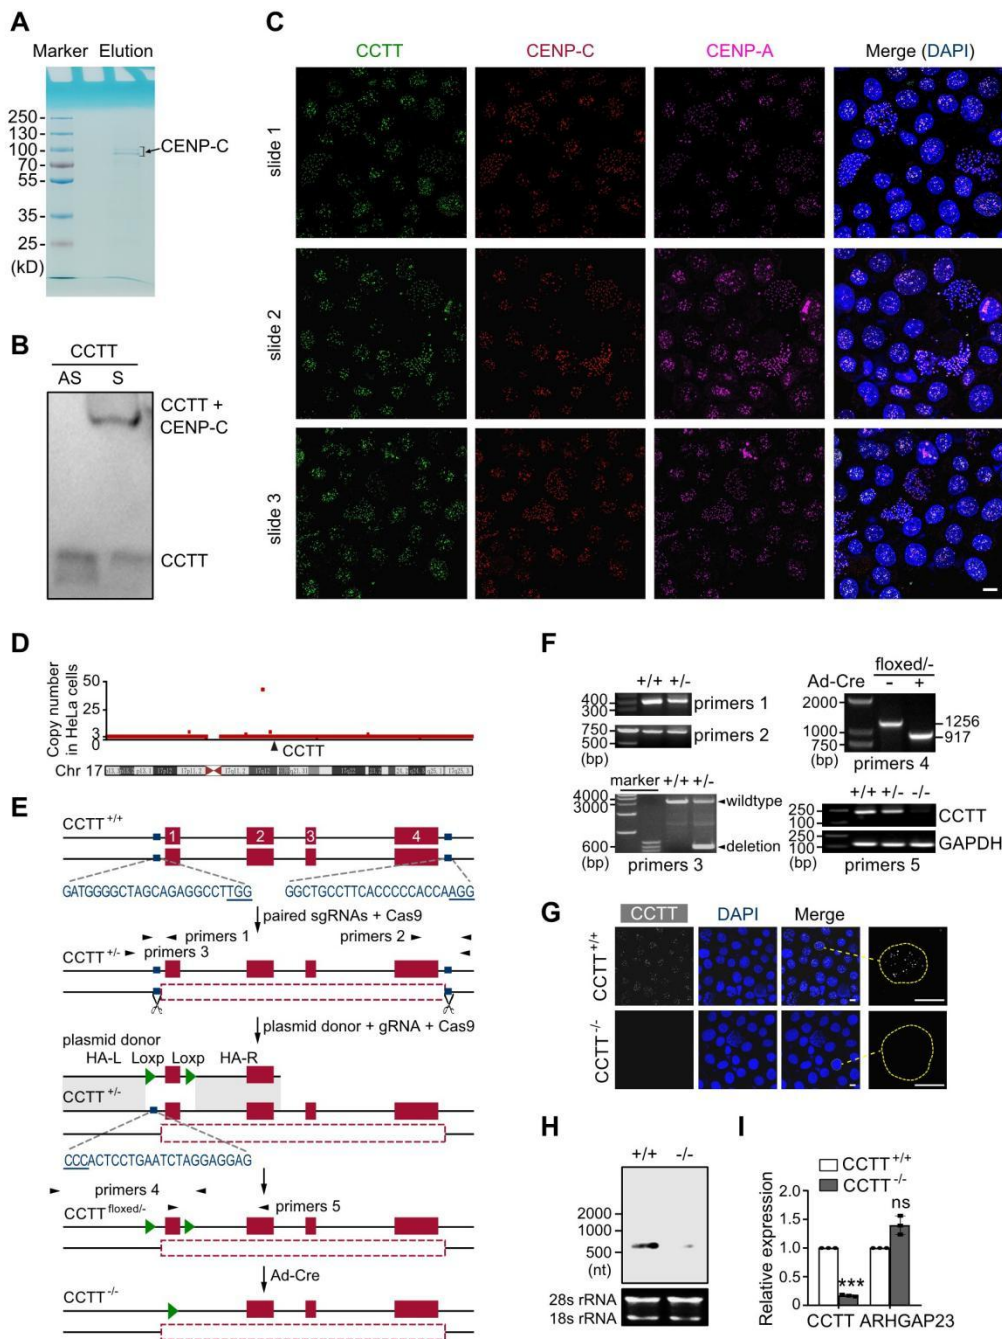

41 **Figure S2. CCTT colocalizes with CENP-C and Identification of**  
 42 **Conditional Knockout of CCTT, Related to Figures 1 and 2**  
 43 (A) His-tagged CENP-C was solved by 10% Tris-Glycine gel (SDS-PAGE) and  
 44 visualized using Coomassie Brilliant Blue Staining.  
 45 (B) EMSA assay of CCTT specifically interacted with CENP-C. EMSA imaging

46 with 0.7 pmol biotinylated sense or antisense CCTT binding to 2.5  $\mu$ M purified  
47 recombinant CENP-C proteins.

48 (C) CCTT FISH (green), CENP-C (red) and CENP-A (pink) IF analyses of  
49 HeLa cells of three different slides are shown. Scale bars, 10  $\mu$ m.

50 (D) The copy number of CCTT locus in HeLa cells. Most genes encoded by  
51 Chr. 17 have 3 copies as specifically indicated at the y-axis. The CCTT locus  
52 is labeled with an arrowhead.

53 (E) Schematic of the strategy for generating conditional CCTT knockout in  
54 HeLa cells stably expressing Cas9. The gRNA-coding sequences are blue  
55 with the protospacer-adjacent motif (PAM) sequences underlined. In the donor  
56 sequences, two LoxP sites flanking CCTT exon 1 are indicated as triangles.  
57 Primers for PCR genotyping are 1-4, while primers for RT-PCR are 5.

58 (F) Left: PCR analysis with primers 1, 2, and 3 to screen CCTT<sup>+/-</sup> cells.  
59 Products of primers 1 (391 bp) and 2 (715 bp) are specific for the wildtype  
60 allele and products of primers 3 are specific for the CCTT full-length deletion  
61 allele (3164 bp for wildtype allele and ~558 bp for deletion allele, showed by  
62 black arrow). Right top: PCR analysis with primers 4 in CCTT<sup>floxed/-</sup> cells after  
63 adenovirus-Cre (Ad-Cre) treatment. Right bottom: RT-PCR analysis with  
64 primers 5 for CCTT expression in CCTT<sup>+/+</sup>, CCTT<sup>+/-</sup>, and CCTT<sup>-/-</sup> cells.

65 (G) CCTT FISH (white) analysis of CCTT<sup>+/+</sup> and CCTT<sup>-/-</sup> cells. The right panel  
66 is the enlarged view of one selected cell. Scale bars, 10  $\mu$ m.

67 (H) Northern blot analysis of CCTT expression in CCTT<sup>+/+</sup> and CCTT<sup>-/-</sup> cells  
68 using a probe against the Alu-deleted CCTT. Agarose gel shown bottom

69 indicates comparable amounts of total RNA.

70 (I) *ARHGAP23* expression was unchanged in CCTT<sup>-/-</sup> cells. qRT-PCR analysis

71 of CCTT and *ARHGAP23* in CCTT<sup>+/+</sup> and CCTT<sup>-/-</sup> cells. \*\*\*p < 0.001; ns, no

72 significant difference (mean ± SD, n = 3 per group).

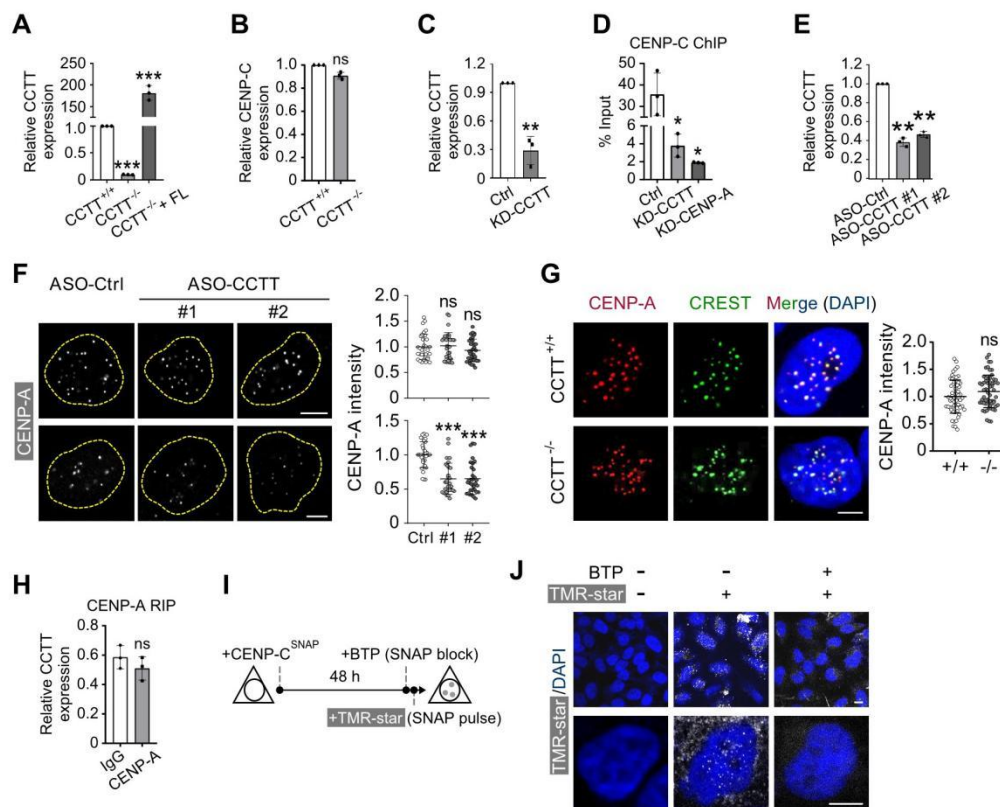

73 **Figure S3. CCTT Does Not Affect Total CENP-C Level and Its**

74 **Maintenance, as well as CENP-A at Centromeres, Related to Figure 2**

75 (A) Re-expression of CCTT in CCTT<sup>-/-</sup> cells. Quantification of CCTT level in  
76 HeLa cells by qRT-PCR. \*\*\*p < 0.001 (mean ± SD, n = 3 per group).

77 (B) qRT-PCR analysis of CENP-C in CCTT<sup>+/+</sup> and CCTT<sup>-/-</sup> HeLa cells. ns, no  
78 significant difference (mean ± SD, n = 3 per group).

79 (C) CCTT knockdown (KD-CCTT) by siRNA treatment for 48 hours in HeLa  
80 cells. Quantification of CCTT level by qRT-PCR. \*\*p < 0.01 (mean ± SD, n = 3  
81 per group).

82 (D) CCTT knockdown decreased the association of CENP-C with cenDNA.

83 CENP-C ChIP followed by qPCR analysis of cenDNA in KD-CCTT or

84 KD-CENP-A HeLa cells. \* $p < 0.05$  (mean  $\pm$  SD,  $n = 3$  per group).

85 (E) CCTT knockdown by ASO treatment (ASO-CCTT #1 and #2) for 48 hours  
86 in HeLa cells. Quantification of CCTT level by qRT-PCR. \*\* $p < 0.01$  (mean  $\pm$   
87 SD,  $n = 3$  per group).

88 (F) CENP-A (white) IF analyses of HeLa cells that were transfected with  
89 negative control ASO (ASO-Ctrl) or two CCTT ASOs (ASO-CCTT #1 and #2)  
90 for 48 hours (top) and 96 hours (bottom). The nuclei stained by DAPI are  
91 outlined with dotted circles. Scale bar, 5  $\mu\text{m}$  (left). The quantifications of  
92 CENP-A signals by IMARIS (right) are shown.  $n = 32$  for Ctrl cells,  $n = 32$  for  
93 ASO #1 cells,  $n = 33$  for ASO #2 cells (top) and  $n = 33$  for Ctrl cells,  $n = 30$  for  
94 ASO #1 cells,  $n = 32$  for ASO #2 cells (bottom). \*\*\* $p < 0.001$ ; ns, no significant  
95 difference (mean  $\pm$  SD of three biological replicates).

96 (G) CENP-A (red) and CREST (green) IF analyses of CCTT<sup>+/+</sup> and CCTT<sup>-/-</sup>  
97 cells (left) and the quantification of CENP-A signals by IMARIS (right) are  
98 shown.  $n = 60$  for both CCTT<sup>+/+</sup> and CCTT<sup>-/-</sup> cells. ns, no significant difference  
99 (mean  $\pm$  SD of three biological replicates). Scale bar, 5  $\mu\text{m}$ .

100 (H) CENP-A did not interact with CCTT. CENP-A RIP followed by qPCR  
101 analysis of CCTT in HeLa cells. IgG served as a negative control. ns, no  
102 significant difference (mean  $\pm$  SD,  $n = 3$  per group).

103 (I-J) The strategy to determine the BTP block efficiency (I). CENP-C<sup>SNAP</sup>  
104 detected by TMR-star staining (white) in HeLa cells. Scale bar, 10  $\mu\text{m}$  (J).



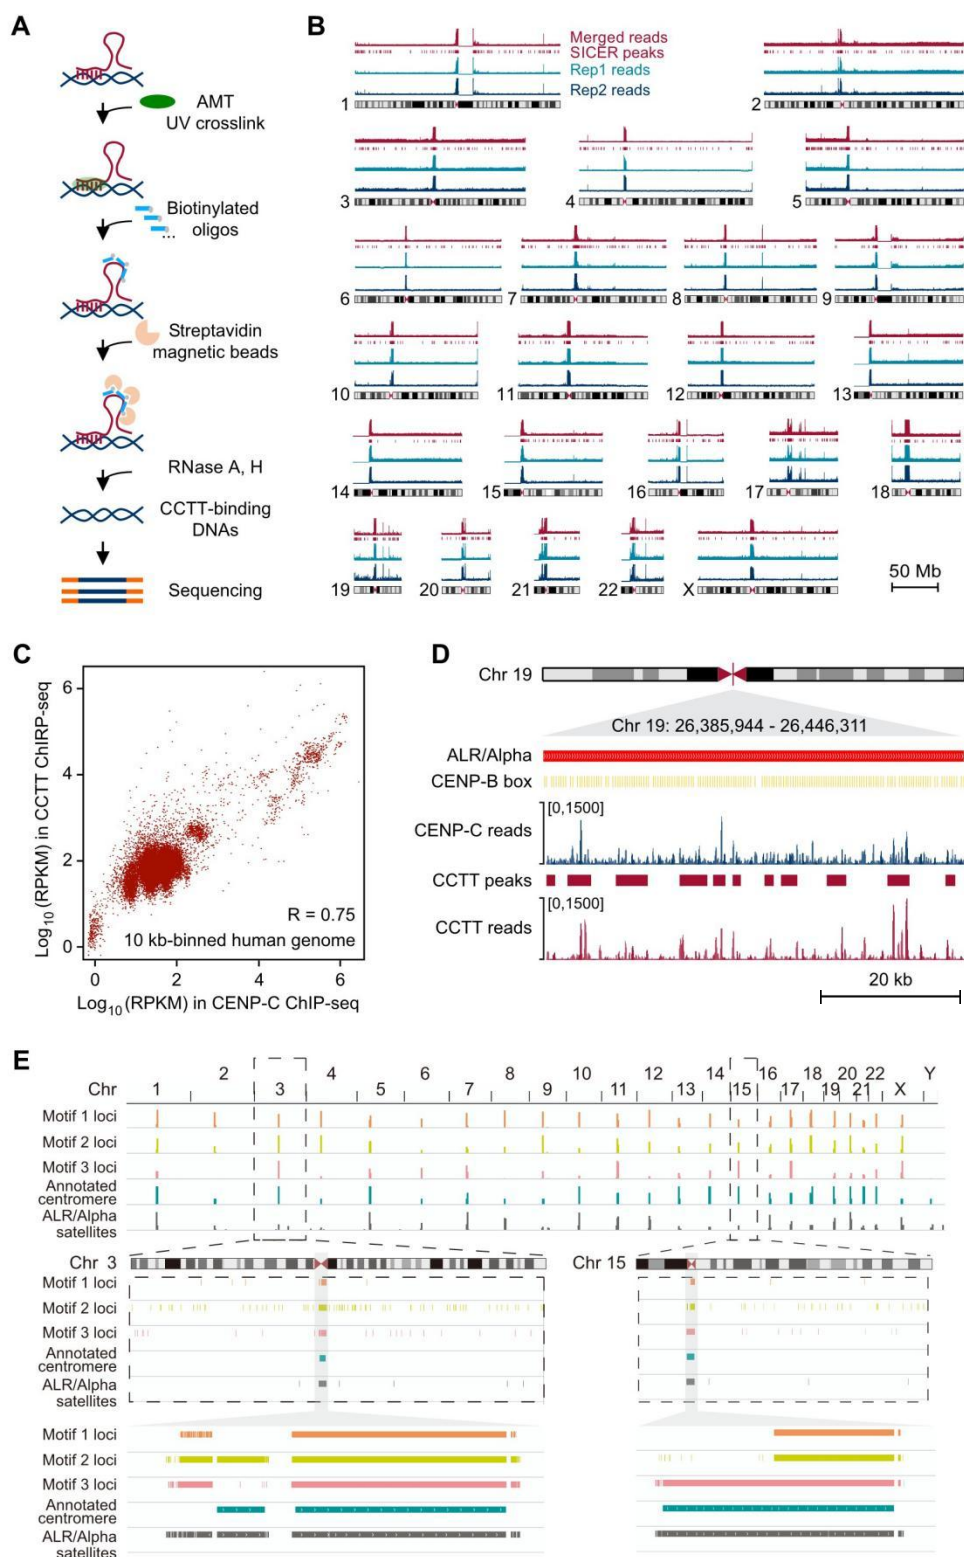

105 **Figure S4. CCTT Binds to CenDNA, Related to Figures 3 and 4**

106 (A) Strategy for CCTT ChIRP-seq with the crosslinker

107 4'-aminomethyltrioxsalen (AMT-ChIRP-seq) in HeLa cells.

108 (B) CCTT AMT-ChIRP-seq raw mapping data (repeat 1, repeat 2, and the  
109 merged one) as well as peaks identified by SICER for all chromosomes of  
110 HeLa cells.

111 (C) Correlation between CCTT and CENP-C binding signals in the 10  
112 kb-binned human genome. Bins are shown as red dots. All R-values were  
113 calculated using Pearson correlation coefficient analysis.

114 (D) Typical genomic regions of Chr. 19 displaying CCTT and CENP-C binding  
115 signals at the centromere. Signals were normalized to RPKM.

116 (E) Using FIMO to map the top three CCTT-binding motifs to the whole  
117 genome with a cut-off p-value  $1 \times 10^{-7}$  (top). Typical genomic regions of Chr. 3  
118 and Chr. 15 displaying three motifs binding signals on the whole  
119 chromosomes (middle) and at centromeres (bottom) are shown.

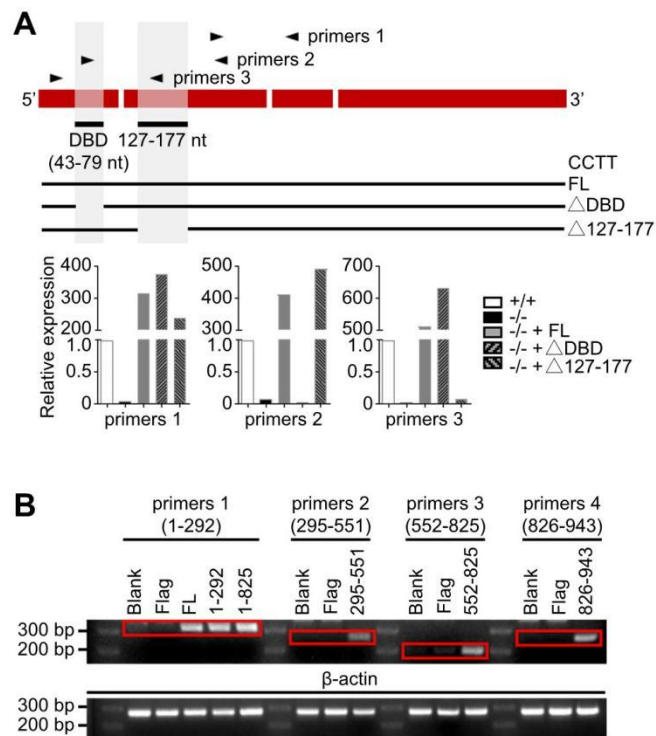

120 **Figure S5. Expressions of Mutant CCTT and CENP-C, Related to Figure 5**

121 (A) Quantification of full-length and mutant CCTT expressions in HeLa cells by  
 122 qRT-PCR. As shown in the diagram (top), primers 1 can detect the full-length  
 123 and mutant CCTT (bottom left), while primers 2 cannot detect  $\Delta$ DBD CCTT  
 124 (bottom middle), and primers 3 cannot detect  $\Delta$ 127-177 CCTT (bottom right).

125 (B) Quantification of flag-tagged full-length and truncate CENP-C expressions  
 126 in HeLa cells by RT-PCR. RNA was treated by DNase I to rule out the possible  
 127 effects of the vector template DNA. Primers 1 can detect the full-length, 1-292,  
 128 and 1-855 CENP-C, while primers 2 can detect 296-551 CENP-C, primers 3  
 129 can detect 552-855 CENP-C, and primers 4 can detect 856-943 CENP-C  
 130 (shown in red boxes).  $\beta$ -actin was used as a loading control.

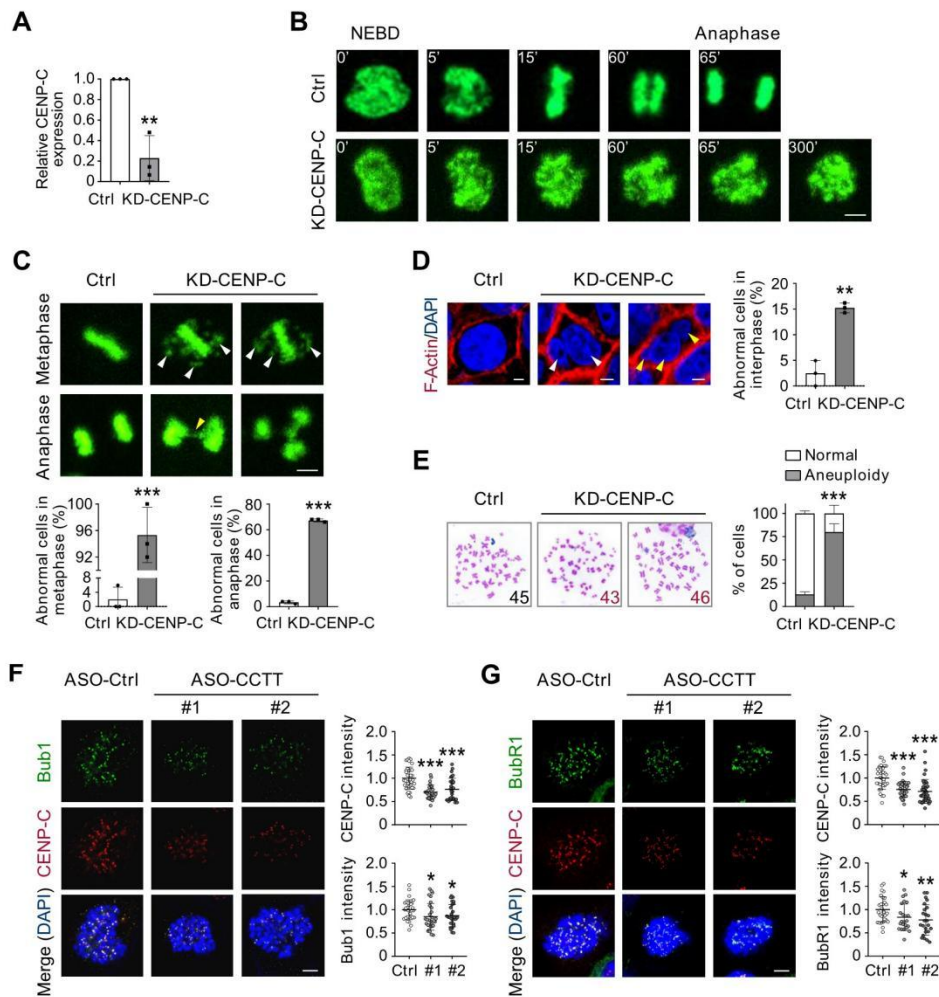

131 **Figure S6. CENP-C Is Required for Accurate Mitosis and Loss of CCTT**  
 132 **Impairs the Spindle Assembly Checkpoint, Related to Figure 6**

133 (A) Quantification of CENP-C expression by qRT-PCR in CENP-C knockdown  
 134 (KD-CENP-C) HeLa cells. \*\* $p < 0.01$  (mean  $\pm$  SD,  $n = 3$  per group).

135 (B) KD-CENP-C HeLa cells exhibit prolonged mitosis. Representative  
 136 time-lapse microscopic images of Ctrl and KD-CENP-C HeLa cells expressing  
 137 histone H2B-GFP during mitosis are shown. Scale bar, 5  $\mu$ m.

138 (C) KD-CENP-C caused mitotic errors in metaphase and anaphase HeLa cells.  
 139 Top: Representative images of mitotic errors by time-lapse assay, including  
 140 alignment defects (white arrowheads), chromosome bridges (yellow  
 141 arrowheads), and multipolar spindles. Bottom: Quantification of the  
 142 percentage of abnormal cells in metaphase (left) and anaphase (right).  $n =$

143 150 for both Ctrl and KD-CENP-C. \*\*\* $p < 0.001$  (mean  $\pm$  SD of three biological  
144 replicates). Scale bar, 5  $\mu\text{m}$ .

145 (D) KD-CENP-C induced abnormal nuclei in interphase HeLa cells. Left:  
146 Binuclei (white arrowheads) and micronuclei (yellow arrowheads) were  
147 detected. Cells were stained with F-Actin (red) and DAPI (blue). Right:  
148 Quantification of the percentage of abnormal cells.  $n = 81$  for Ctrl,  $n = 105$  for  
149 KD-CENP-C. \*\* $p < 0.01$  (mean  $\pm$  SD of three biological replicates). Scale bars,  
150 5  $\mu\text{m}$ .

151 (E) KD-CENP-C caused aneuploidy in HCT116 cells. Left: Representative  
152 images of chromosomes and abnormal numbers are highlighted in red. Right:  
153 Quantification of the percentage of aneuploid cells.  $n = 60$  for both Ctrl and  
154 KD-CENP-C. \*\*\* $p < 0.001$  (mean  $\pm$  SD of three biological replicates).

155 (F) Representative images of Bub1 (green) and CENP-C (red) IF analyses of  
156 CCTT knockdown HeLa cells in pro-metaphase (left). The signal intensities of  
157 Bub1 ( $n = 31$  for ASO-Ctrl,  $n = 30$  for ASO-CCTT #1, and  $n = 27$  for  
158 ASO-CCTT #2) and CENP-C ( $n = 36$  for ASO-Ctrl,  $n = 27$  for ASO-CCTT #1,  
159 and  $n = 32$  for ASO-CCTT #2) were quantified by IMARIS (right). \* $p < 0.05$ ;  
160 \*\*\* $p < 0.001$  (mean  $\pm$  SD of three biological replicates). Scale bar, 5  $\mu\text{m}$ .

161 (G) Representative images of BubR1 (green) and CENP-C (red) IF analyses  
162 of CCTT knockdown HeLa cells in pro-metaphase (left). The signal intensities  
163 of BubR1 ( $n = 29$  for ASO-Ctrl,  $n = 23$  for ASO-CCTT #1, and  $n = 24$  for  
164 ASO-CCTT #2) and CENP-C ( $n = 34$  for ASO-Ctrl,  $n = 33$  for ASO-CCTT #1,  
165 and  $n = 38$  for ASO-CCTT #2) were quantified by IMARIS (right). \* $p < 0.05$ ;  
166 \*\* $p < 0.01$ ; \*\*\* $p < 0.001$  (mean  $\pm$  SD of three biological replicates). Scale bar,  
167 5  $\mu\text{m}$ .

168 **Table S2. CCTT ORFs of *In Vitro* Translation Assay, Related to Star**

169 **Methods**

170 CCTT ORF1 CDS

---

171 **ATG**CAGCTCCCCTTCCCTCCATTCCACCATCCACTGTCCCCAGCAAGA  
172 ACCTGCGGGAGGGTGGCCCAATGGGGAGAAAATAAGGATTCGGTGTT  
173 GGGACCACTCCTGCCCTGACCTGCCCTGTGACTCCGTCATACTCTCCAA  
174 AGGCCAGACCCTCCTAGACCAGCTGGAACCACCATCAAGATGTCCCCA  
175 GCCATGTCAGACTCTGGGGCCCCAGGCGGAGGGCAACCAGATGTCTTC  
176 AGCTCCAAGTCTGGCCTCTCCTCCCAGCAAGCAGCCAACTGCAGAGAC  
177 CTTGAAAGGATCAACCATATACAATGTCCATTTCTGCCCT**TAA**

178 CCTT ORF2 CDS

---

179 **ATG**TCCCCAGCCATGTCAGACTCTGGGGCCCCAGGCGGAGGGCAACCA  
180 GATGTCTTCAGCTCCAAGTCTGGCCTCTCCTCCCAGCAAGCAGCCAACT  
181 GCAGAGACCTTGAAAGGATCAACCATATACAATGTCCATTTCTGCC  
182 TCTAACCTGGCAGGGGAGCAAGGCCAGCCAAGGAGTTACAGAACT**GTG**  
183 **A**
